# Supplementary material for: In situgrowth of TiO2/SiO2nanospheres on glass substratesviasolution impregnation for antifogging
Source: Royal Society of Chemistry journal article supplement (doi:10.1039/c6ra27276b), 2017-01-01
Supplement: c6ra27276b1.pdf [file c6ra27276b1.pdf]

## Supplementary Information

### In Situ Growth of TiO<sub>2</sub>/SiO<sub>2</sub> Nanospheres on the Glass Substrates via Solution Impregnation for Antifogging

Fang Liu <sup>a</sup>, Jie Shen <sup>b</sup>, Wuyi Zhou <sup>c</sup>, Shiyong Zhang <sup>ab\*</sup> and Long Wan <sup>a\*</sup>

<sup>a</sup>. College of Material Science and Engineering, Hunan University, Changsha, 410082, PR China.

<sup>b</sup>. Hunan Key Laboratory of Applied Environmental Photocatalysis, Changsha University, Changsha, 410022, PR China.

<sup>c</sup>. College of Materials and Energy, South China Agricultural University, Guangzhou, 510642, China.

The EDS analysis of the unheated TiO<sub>2</sub>/SiO<sub>2</sub> nanospheres has been provided in the ESI file as Fig. S1, from which the distinct peak of C was observed. Considering of the almost invisible peak of C in the heated sample (Fig. 2b), it can be perceived that the carbon in the system was almost completely removed. What's more, the element distribution (Ti, Si and C) from EDS mapping of the TiO<sub>2</sub>/SiO<sub>2</sub> nanospheres before and after the calcination treatment has been provided in the ESI file as Fig. S2. As shown in Fig. S2, the carbon element concentrated in the cavity of the nanospheres before the calcination and disappeared after the heat treatment. The result proved the spherical multilamellar vesicle template structure forming the lamellar phases in the immersing solution and the complete removal of the template after the calcination treatment.

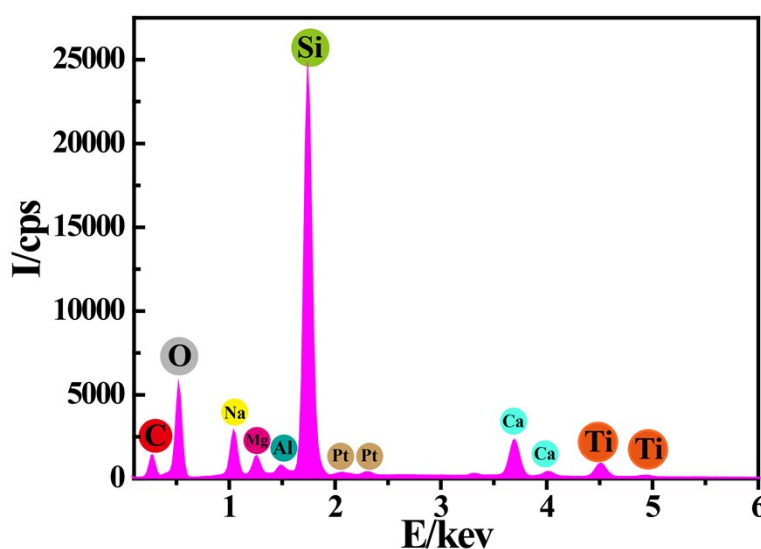

Fig. S1 EDS analysis of the unheated TiO<sub>2</sub>/SiO<sub>2</sub> nanospheres.

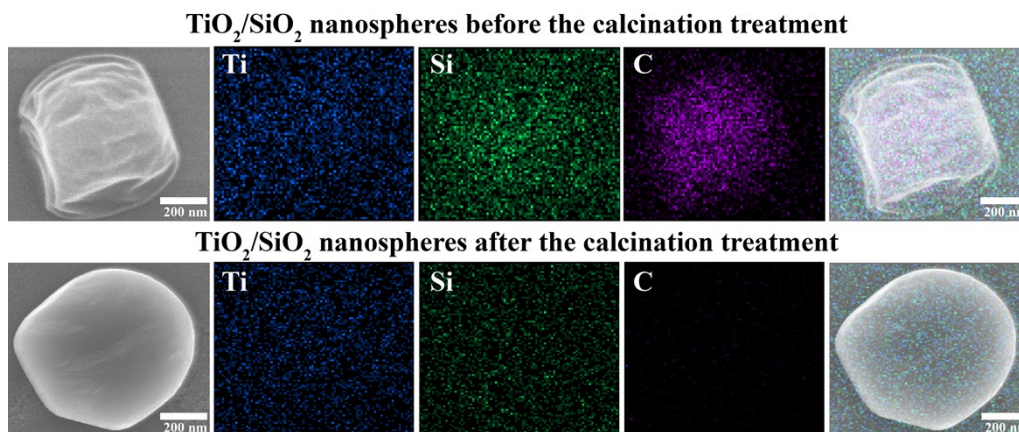

Fig. S2 Element distribution (Ti, Si and C) from EDS mapping of the TiO<sub>2</sub>/SiO<sub>2</sub> nanospheres before and after the calcination treatment.

The magnification FESEM image of the rod-like nicks has been provided in the ESI file as Fig. S3. The average size of rod-like silica particles is at the length of about 125 nm and diameter of 15 nm from the heated sample SP<sub>6</sub>. The size of the circular holes is about 500 nm from the heated sample SP<sub>12</sub>. The size of the bowl-like structure is about 300 nm from the heated sample SP<sub>24</sub>. The size of the spherical structure is about 800nm from the un-heating SP<sub>48</sub>.

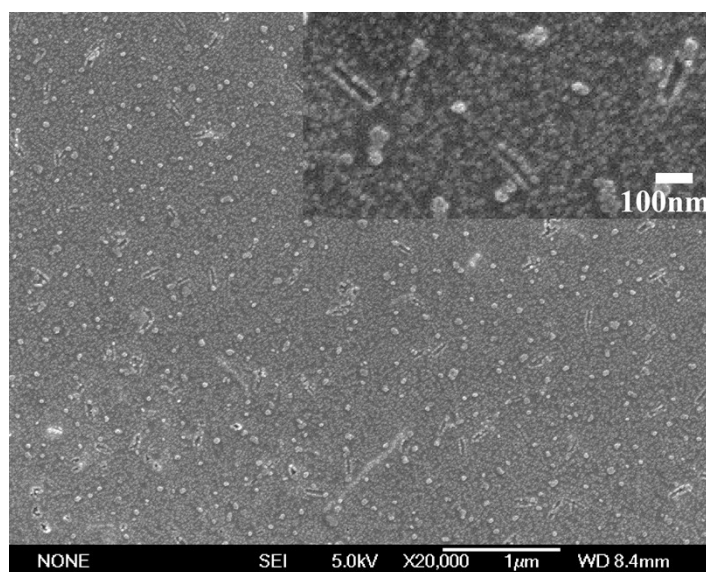

Fig. S3 Magnification FESEM image of in situ growing SiO<sub>2</sub> particles with 6h immersing time.

The powders of the heated samples (SP<sub>48</sub> and TiO<sub>2</sub>/SiO<sub>2</sub>) were collected from the glass substrates and FTIR analysis was taken. The result has been provided in the ESI file as Fig. S4. As seen from Fig. S4, the characteristic peaks of CTATos at 3034, 2918 and 2849 cm<sup>-1</sup> weren't observed<sup>S1</sup>.

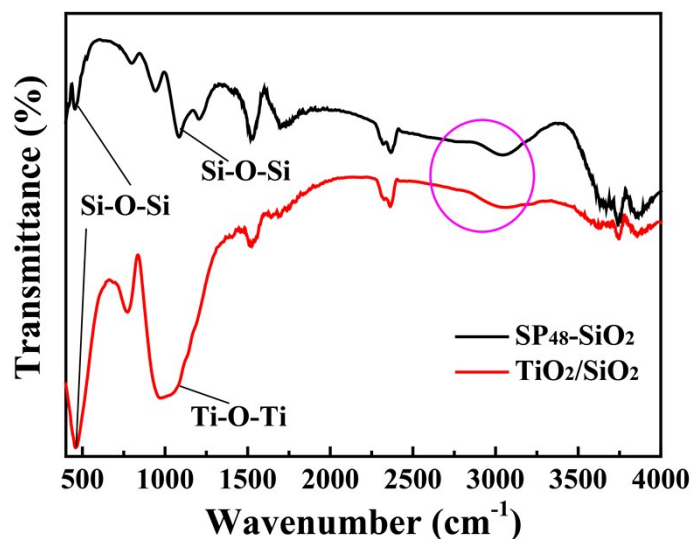

Fig. S4 FT-IR spectra of the heated sample SP<sub>48</sub> and TiO<sub>2</sub>/SiO<sub>2</sub> nanospheres.

The TEM image of TiO<sub>2</sub>/SiO<sub>2</sub> nanospheres have been taken and provided in the ESI file as Fig. S5. We suspect that the hollow structure was not observed because of the huge size and the thick shells of nanospheres.

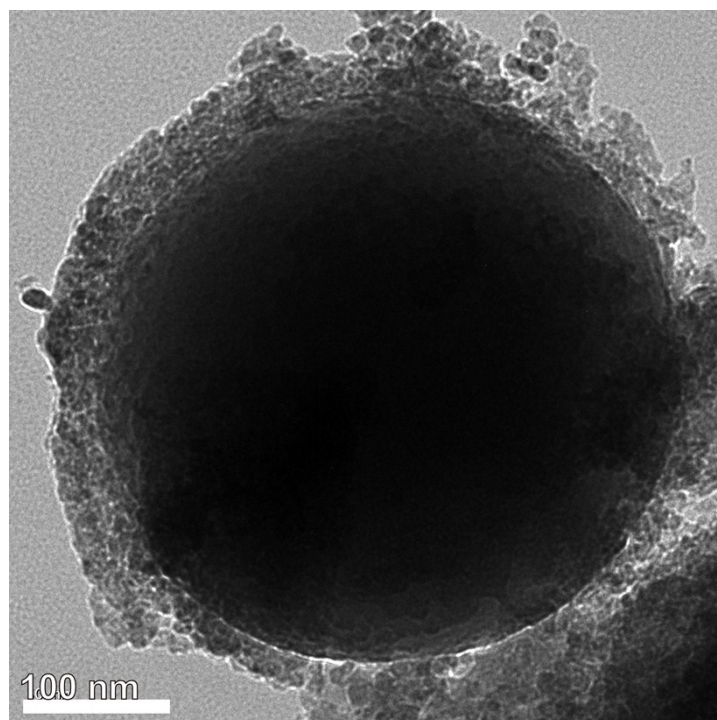

Fig. S5 TEM image of TiO<sub>2</sub>/SiO<sub>2</sub> nanospheres

**Reference:**

S1 J. F. A. Soltero and J. E. Puig, Langmuir, 1995, **11**, 3337-3346.
